# Supplementary material for: Integrative clustering reveals a novel split in the luminal A subtype of breast cancer with impact on outcome
Source: PubMed Central journal article supplement (PMC5372339; doi:10.1186/s13058-017-0812-y), 2017-03-29

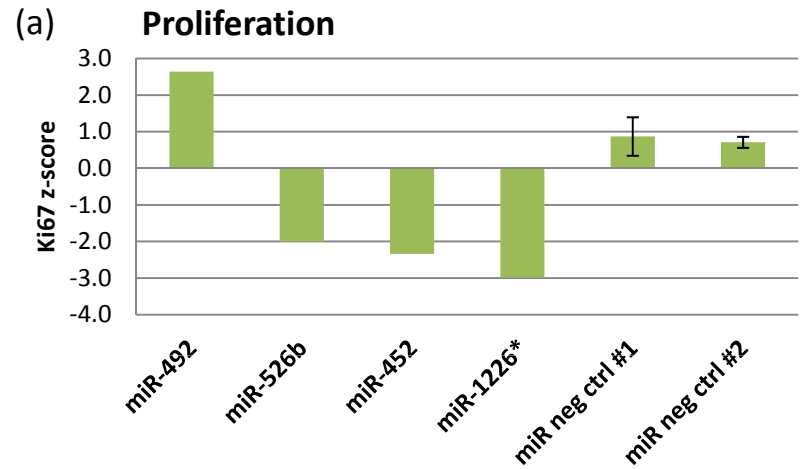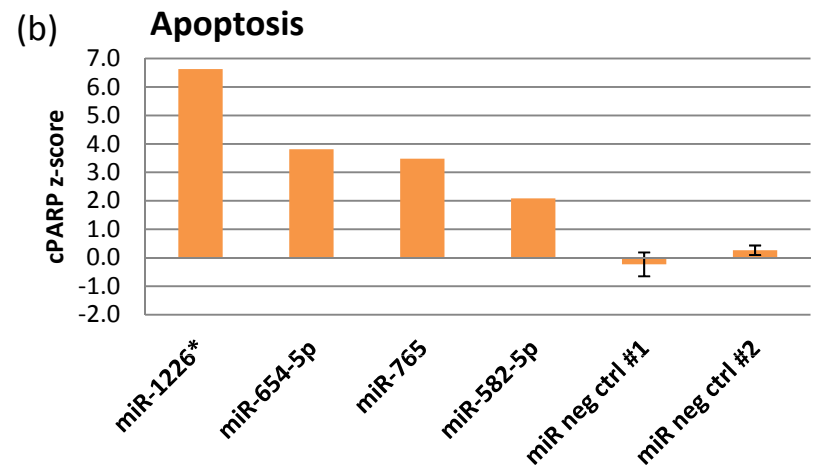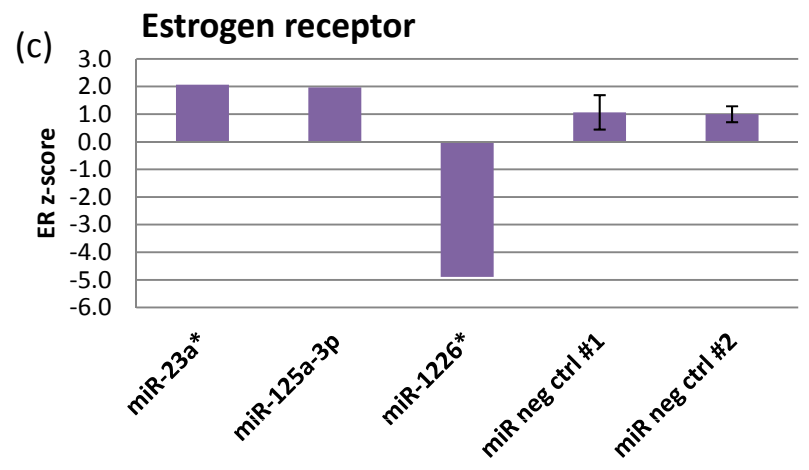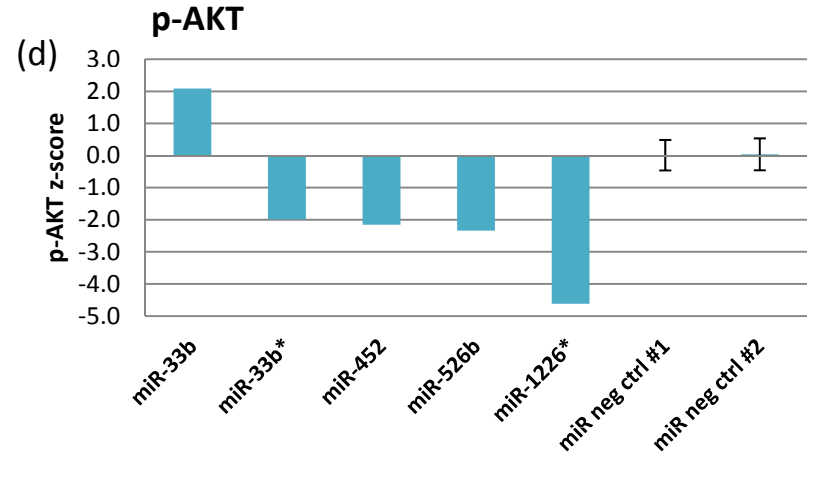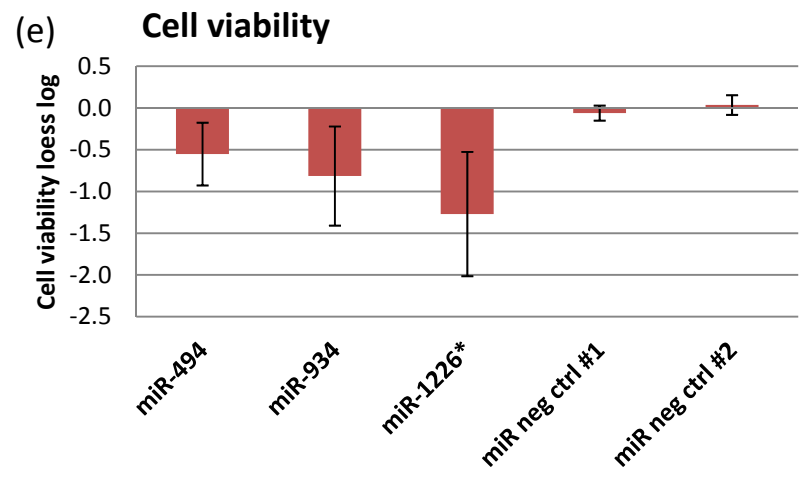

Supplement: 13058_2017_812_MOESM8_ESM.pdf [file 13058_2017_812_MOESM8_ESM.pdf]
