# Supplementary material for: Integrative clustering reveals a novel split in the luminal A subtype of breast cancer with impact on outcome
Source: Springer Nature journal article supplement (doi:10.1186/s13058-017-0812-y), 2017-03-29
Supplement: MOESM3 [file 12186986]

Additional file 3

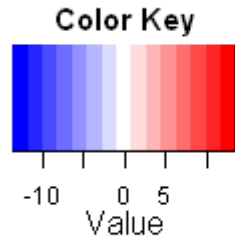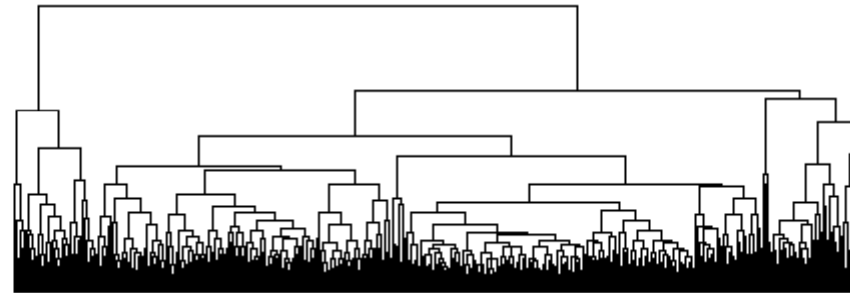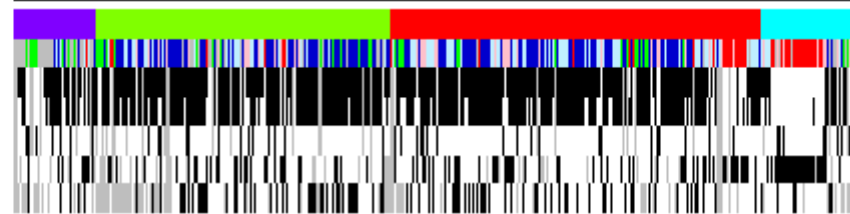

miRNA cluster  
PAM50  
ER  
PR  
HER2  
*TP53*  
*PIK3CA*

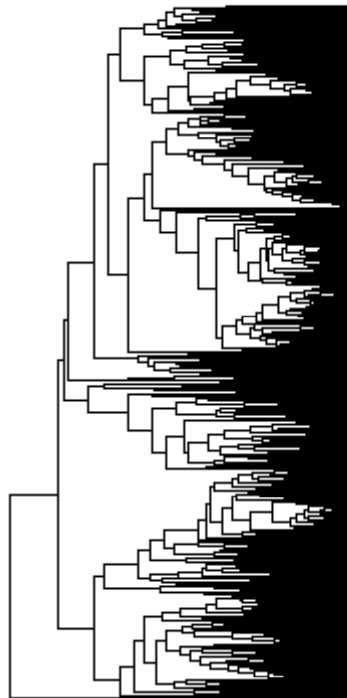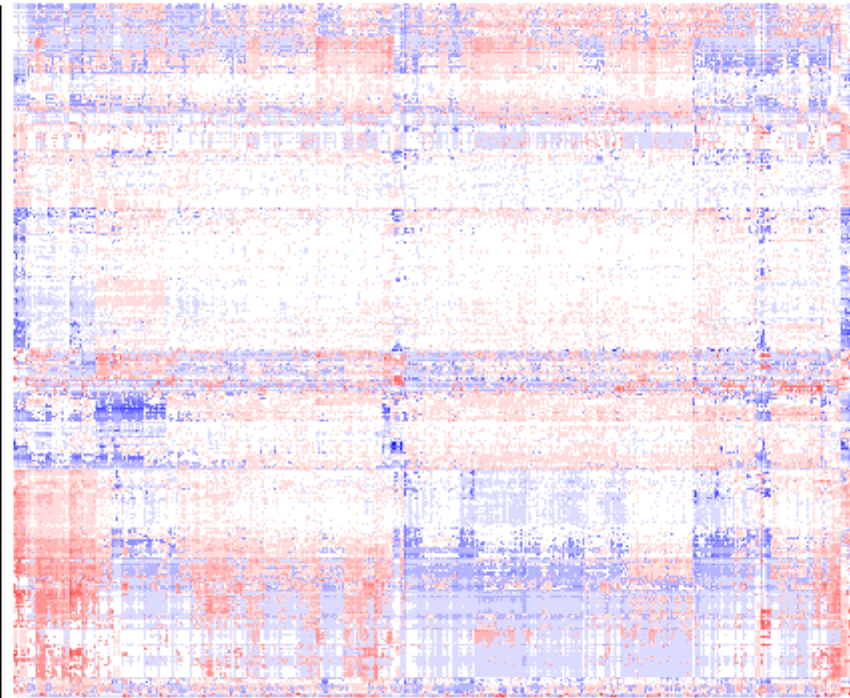

miRNA cluster

- 1
- 2
- 3
- 4

ER, PR, HER2/  
*TP53, PIK3CA*

- Positive/Mutated
- Negative/Wild-type
- NA

PAM50

- Luminal A
- Luminal B
- Basal
- HER2
- Normal-like
- NA
