# Supplementary material for: Integrative clustering reveals a novel split in the luminal A subtype of breast cancer with impact on outcome
Source: Springer Nature journal article supplement (doi:10.1186/s13058-017-0812-y), 2017-03-29

Additional file 9

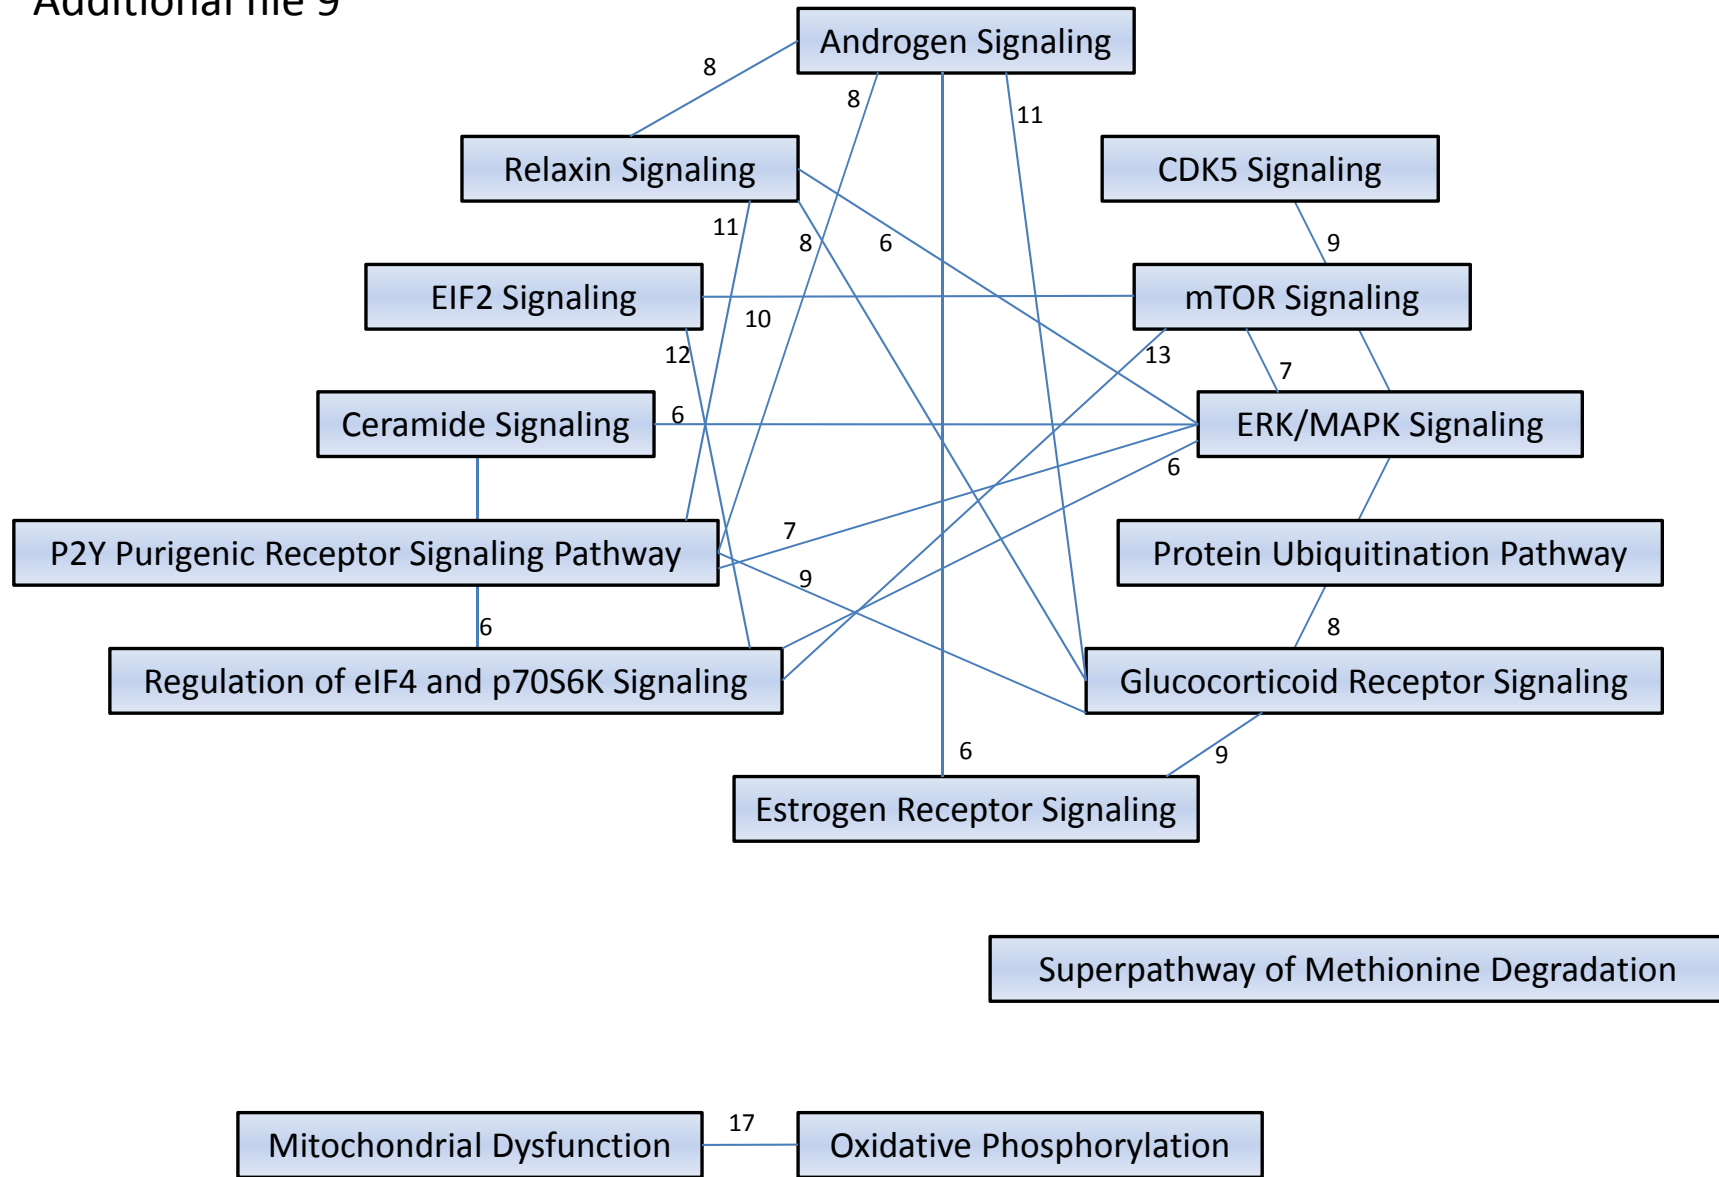

Supplement: MOESM9 [file 12186986]
