# Supplementary material for: Integrative clustering reveals a novel split in the luminal A subtype of breast cancer with impact on outcome
Source: Springer Nature journal article supplement (doi:10.1186/s13058-017-0812-y), 2017-03-29

**53BP1**

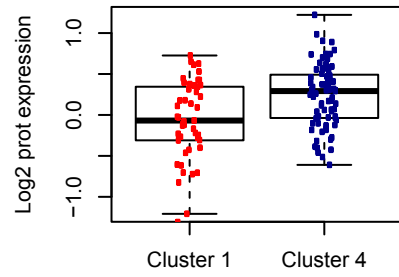

**AMPK alpha**

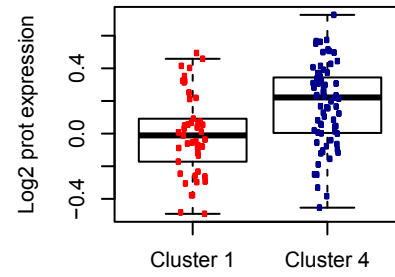

**Caspase-9 (cleaved)**

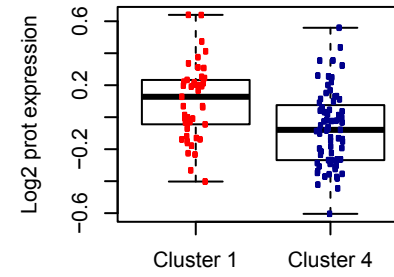

**GATA3**

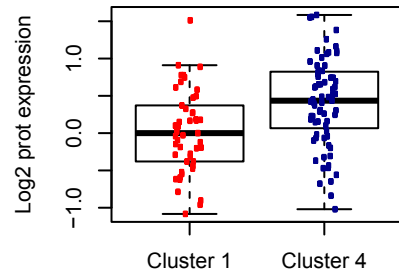

**p90RSK (pT359 + pS363)**

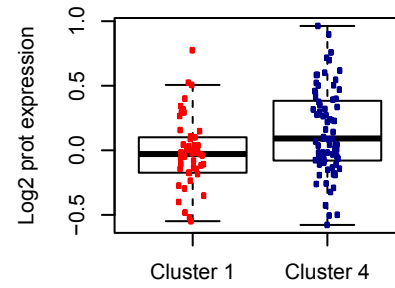

**Rad51**

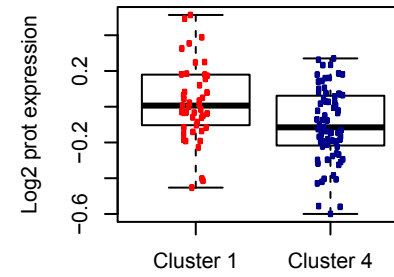

Supplement: MOESM10 [file 12186986]
